# Supplementary material for: Promoter activity of ORF-less gene cassettes isolated from the oral metagenome
Source: PubMed Central journal article supplement (PMC6557892; doi:10.1038/s41598-019-44640-2), 2019-06-10
Supplement: 41598_2019_44640_MOESM1_ESM.pdf [file 41598_2019_44640_MOESM1_ESM.pdf]

## **Supporting Information**

### **Promoter activity of ORF-less gene cassettes isolated from the oral metagenome**

**Supathep Tansirichaiya<sup>1,#a</sup>, Peter Mullany<sup>1</sup>, Adam P. Roberts<sup>1,2\*</sup>**

<sup>1</sup>Department of Microbial Diseases, University College London, Eastman Dental Institute, 256 Gray's Inn Road, London, WC1X 8LD, UK.

<sup>2</sup>Liverpool School of Tropical Medicine, Pembroke Place, Liverpool, L3 5QA, UK

\*Corresponding author; Liverpool School of Tropical Medicine, Pembroke Place, Liverpool, L3 5QA, UK

T: +44(0)151 705 3247. E: [Adam.Roberts@lstmed.ac.uk](mailto:Adam.Roberts@lstmed.ac.uk)

<sup>#a</sup>Current Address: Department of Clinical Dentistry, Faculty of Health Sciences, UiT the Arctic University of Norway, Tromsø, Norway

**Supplementary Table S1. The putative promoters for ORF-less GCs and GCs with an ORF (SSU17 and MMB3) predicted using BPRM.**

| Clones | Strand | -10 box    | -35 box | Score   |         |                                                        |
|--------|--------|------------|---------|---------|---------|--------------------------------------------------------|
|        |        |            |         | -10 box | -35 box | Linear discriminant function (LDF)*<br>(Overall score) |
| TMB4   | +      | AGGTATAAT  | ATAAGA  | 89      | -10     | 9.78                                                   |
|        | -      | CATTATTTT  | TTGACA  | 41      | 66      | 7.60                                                   |
| SSU9   | +      | AATTATAAT  | TAAAAA  | 74      | 0       | 7.04                                                   |
|        | -      | TAGTATAAT  | TTTATT  | 80      | 34      | 7.11                                                   |
| MMU2   | +      | AATTATAAT  | TTAAAA  | 74      | 37      | 8.36                                                   |
|        | -      | TAGTATAAT  | TTTATT  | 80      | 34      | 8.90                                                   |
| MMU11  | +      | ATGTAAAAT  | TTGCTG  | 75      | 47      | 11.34                                                  |
|        | +      | AACTATACT  | AGGAAA  | 59      | -7      | 5.99                                                   |
|        | -      | AAATAAAAAT | TTTTCA  | 56      | 34      | 6.96                                                   |
|        | -      | CTATAAATT  | TTTCAA  | 44      | 36      | 3.24                                                   |
| MMU19  | +      | AGGTATAAT  | TAGAAA  | 89      | 23      | 9.07                                                   |
|        | +      | TTGAAAAAT  | TTGCGG  | 44      | 32      | 3.43                                                   |
|        | -      | TATTATAAT  | TTTCCT  | 79      | 37      | 9.10                                                   |
| MMU23  | +      | AATTATAAT  | TAAAAG  | 74      | -6      | 9.84                                                   |
|        | +      | TTTTATTAT  | TTGATG  | 72      | 52      | 6.05                                                   |
|        | -      | TATTATAAT  | TTTCCT  | 79      | 37      | 8.66                                                   |
|        | -      | TAGTATAAT  | TTTATT  | 80      | 34      | 8.05                                                   |
| MMB2   | +      | AATTATAAT  | TATAAG  | 74      | -2      | 8.71                                                   |
|        | +      | TATTATAAT  | TTGATG  | 79      | 52      | 7.88                                                   |
|        | -      | TATTATAAT  | TTTCCT  | 79      | 37      | 9.10                                                   |
|        | -      | TATTATAAT  | TTTATT  | 79      | 34      | 8.84                                                   |
| MMB5   | +      | AATTATAAT  | TTAAAA  | 74      | 37      | 8.36                                                   |
|        | -      | TAGTATAAT  | TTTATT  | 80      | 34      | 7.95                                                   |

| Clones | Strand | -10 box   | -35 box | Score   |         |                                                        |
|--------|--------|-----------|---------|---------|---------|--------------------------------------------------------|
|        |        |           |         | -10 box | -35 box | Linear discriminant function (LDF)*<br>(Overall score) |
| MMB20  | +      | AATTATAAT | TAAAAG  | 74      | -6      | 9.09                                                   |
|        | -      | TATTATAAT | TTTCCT  | 79      | 37      | 9.10                                                   |
| MMB32  | +      | TATTATAAT | TTGATG  | 79      | 52      | 6.28                                                   |
|        | +      | AGATATAAA | GTGTAA  | 39      | 14      | 4.84                                                   |
|        | -      | TATTATAAT | TTGATT  | 79      | 53      | 6.61                                                   |
|        | -      | TTTTATTTT | TTAAAA  | 52      | 37      | 5.11                                                   |
| MMB36  | +      | AATTATAAT | TTAAAA  | 74      | 37      | 6.94                                                   |
|        | +      | TATTATAAT | TTGATG  | 79      | 52      | 6.45                                                   |
|        | -      | TATTATAAT | TTTATT  | 79      | 34      | 7.44                                                   |
|        | -      | TTTTAAAAT | TTGACT  | 79      | 61      | 6.13                                                   |
| MMB37  | +      | AATTATAAT | TAAAAG  | 74      | -6      | 9.11                                                   |
|        | +      | TTATATAAT | TTGATG  | 75      | 52      | 8.55                                                   |
|        | -      | TAGTATTAT | TTTATT  | 66      | 34      | 10.48                                                  |
|        | -      | TATTATAAT | TTTCCT  | 79      | 37      | 9.10                                                   |
| SSU17  | +      | CTTTATAAT | ATGAAT  | 82      | 25      | 7.80                                                   |
|        | +      | TGATAAAAT | GTGAAA  | 75      | 27      | 4.62                                                   |
|        | -      | TGATATAAT | TTTATT  | 82      | 34      | 9.34                                                   |
|        | -      | TGATTAGAT | TTTATG  | 21      | 33      | 5.10                                                   |
| MMB3   | +      | CTGTATATT | TTGATA  | 63      | 58      | 6.74                                                   |
|        | +      | ATTTATGAT | ATGAAA  | 65      | 30      | 5.18                                                   |
|        | -      | ATGTATTGT | TTGATG  | 44      | 52      | 6.64                                                   |
|        | -      | GCATATAAT | TTCTCT  | 65      | 28      | 4.75                                                   |

\* The LDF takes into account motifs found in promoters: -10 and -35 boxes, a distance between -10 and -35 boxes, and frequencies of certain nucleotides represented in transcription start sites. It can be approximated as  $\log(\frac{\text{likelihood of a site being promoter}}{\text{likelihood of a site not being promoter}})$ <sup>1</sup>

\*\* The selected samples for the enzymatic assay are highlighted in yellow.

**Supplementary Table S2. Characterisation of the human oral integron GCs containing promoter sequences detected by pBiDiPD.**

| Gene cassettes | Primer pair | Cassette Size (bp) | Orientation*                                                                        | BlastN            |                                       | BlastX                                                                                                |               |                                      |                                                      | Promoter activity            |                                  | Accession number |
|----------------|-------------|--------------------|-------------------------------------------------------------------------------------|-------------------|---------------------------------------|-------------------------------------------------------------------------------------------------------|---------------|--------------------------------------|------------------------------------------------------|------------------------------|----------------------------------|------------------|
|                |             |                    |                                                                                     | Closest homologue | Percentage identity (%)/ Coverage (%) | Closest homologue                                                                                     | ORF size (bp) | Percentage identity (%)/Coverage (%) | Accession number of the homologous proteins (BlastX) | Sense Strand ( <i>gusA</i> ) | Antisense strand ( <i>lacZ</i> ) |                  |
| SSU-Pro-7      | SUPA3-SUPA4 | 1001               |    | SSU22             | 98/95                                 | Prevent-host-death protein (Phd_YefM antitoxin superfamily) [ <i>Treponema vincentii</i> ]            | 264           | 97/100                               | WP_006188308.1                                       | Y                            | N                                | MH536747         |
|                |             |                    |                                                                                     |                   |                                       | XRE family transcriptional regulator [ <i>Treponema vincentii</i> ]                                   | 441           | 98/100                               | WP_006188306.1                                       |                              |                                  |                  |
| SSU-Pro-9      | SUPA3-SUPA4 | 834                |    | MMB3              | 98/99                                 | Hypothetical protein (antitoxin, ribbon-helix-helix domain protein) [ <i>Treponema putidum</i> ]      | 246           | 67/100                               | WP_044978234.1                                       | Y                            | N                                | MH536748         |
|                |             |                    |                                                                                     |                   |                                       | Twitching motility protein PilT (PIN toxin domain) [ <i>Treponema putidum</i> ]                       | 414           | 71/100                               | AIN93467.1                                           |                              |                                  |                  |
| SSU-Pro-13     | SUPA3-SUPA4 | 855                |  | MMB39             | 98/99                                 | Toxin RelE [ <i>Treponema medium</i> ]                                                                | 357           | 95/100                               | WP_016522532.1                                       | Y                            | N                                | MH536749         |
|                |             |                    |                                                                                     |                   |                                       | Transcriptional regulator (Antitoxin, XRE family) [ <i>Treponema medium</i> ]                         | 330           | 95/100                               | WP_016522533.1                                       |                              |                                  |                  |
| SSU-Pro-16     | SUPA3-SUPA4 | 925                |  | SSU28             | 98/100                                | AbrB/MazE/SpoVT family DNA-binding domain-containing protein (Antitoxin) [ <i>Treponema putidum</i> ] | 231           | 96/100                               | WP_044979179.1                                       | Y                            | N                                | MH536750         |

| Gene cassettes | Primer pair | Cassette Size (bp) | Orientation*                                                                        | BlastN                                  |                                      | BlastX                                                                                   |               |                                      |                                                      | Promoter activity            |                                  | Accession number |
|----------------|-------------|--------------------|-------------------------------------------------------------------------------------|-----------------------------------------|--------------------------------------|------------------------------------------------------------------------------------------|---------------|--------------------------------------|------------------------------------------------------|------------------------------|----------------------------------|------------------|
|                |             |                    |                                                                                     | Closest homologue                       | Percentage identity (%)/Coverage (%) | Closest homologue                                                                        | ORF size (bp) | Percentage identity (%)/Coverage (%) | Accession number of the homologous proteins (BlastX) | Sense Strand ( <i>gusA</i> ) | Antisense strand ( <i>lacZ</i> ) |                  |
|                |             |                    |                                                                                     |                                         |                                      | Endoribonuclease MazF (Toxin) [ <i>Treponema denticola</i> ]                             | 336           | 99/100                               | WP_010694033.1                                       |                              |                                  |                  |
| SSU-Pro-20     | SUPA3-SUPA4 | 1263               |    | MMU28                                   | 77/42                                | Prevent-host-death protein (Phd_YefM antitoxin superfamily) [ <i>Treponema sp. JC4</i> ] | 249           | 75/88.3                              | WP_009103386.1                                       | Y                            | N                                | MH536751         |
|                |             |                    |                                                                                     |                                         |                                      | Plasmid stabilization protein (ParE toxin superfamily) [ <i>Treponema sp. JC4</i> ]      | 147           | 57/43.8                              | WP_009104800.1                                       |                              |                                  |                  |
| SSU-Pro-24     | SUPA3-SUPA4 | 425                |    | SSU9                                    | 99/100                               | -                                                                                        | -             | -                                    | -                                                    | Y                            | Y                                | MH536752         |
| SSU-Pro-27     | SUPA3-SUPA4 | 753                |   | <i>Treponema putidum</i> strain OMZ 758 | 93/100                               | BrnT family toxin [ <i>Treponema sp.</i> ]                                               | 273           | 99/100                               | WP_002666393.1                                       | Y                            | N                                | MH536753         |
|                |             |                    |                                                                                     |                                         |                                      | CopG family transcriptional regulator (BrnA antitoxin) [ <i>Treponema denticola</i> ]    | 288           | 99/100                               | WP_044909778.1                                       |                              |                                  |                  |
| SSU-Pro-32     | SUPA3-SUPA4 | 972                |  | No significant similarity found.        | -                                    | RelE/ParE family toxin [ <i>Treponema denticola</i> ]                                    | 354           | 98/100                               | WP_002683264.1                                       | Y                            | N                                | MH536754         |
|                |             |                    |                                                                                     |                                         |                                      | XRE family transcriptional regulator [ <i>Treponema denticola</i> ]                      | 273           | 100/100                              | WP_002683262.1                                       |                              |                                  |                  |

| Gene cassettes | Primer pair | Cassette Size (bp) | Orientation*                                                                        | BlastN                          |                                      | BlastX                                                                                                  |               |                                      |                                                      | Promoter activity            |                                  | Accession number |
|----------------|-------------|--------------------|-------------------------------------------------------------------------------------|---------------------------------|--------------------------------------|---------------------------------------------------------------------------------------------------------|---------------|--------------------------------------|------------------------------------------------------|------------------------------|----------------------------------|------------------|
|                |             |                    |                                                                                     | Closest homologue               | Percentage identity (%)/Coverage (%) | Closest homologue                                                                                       | ORF size (bp) | Percentage identity (%)/Coverage (%) | Accession number of the homologous proteins (BlastX) | Sense Strand ( <i>gusA</i> ) | Antisense strand ( <i>lacZ</i> ) |                  |
| SSU-Pro-34     | SUPA3-SUPA4 | 832                |    | SSU5                            | 99/100                               | Hypothetical protein (antitoxin, ribbon-helix-helix domain protein) [ <i>Treponema putidum</i> ]        | 246           | 67/100                               | WP_044978234.1                                       | Y                            | N                                | MH536755         |
|                |             |                    |                                                                                     |                                 |                                      | PIN domain-containing protein [ <i>Treponema putidum</i> ]                                              | 414           | 71/100                               | WP_044978236.1                                       |                              |                                  |                  |
| SSU-Pro-39     | SUPA3-SUPA4 | 1137               |    | MMU25                           | 99/99                                | Hypothetical protein [uncultured bacterium]                                                             | 462           | 99/100                               | ANC55535.1                                           | Y                            | N                                | MH536756         |
|                |             |                    |                                                                                     |                                 |                                      | Hypothetical protein [ <i>Treponema maltophilum</i> ]                                                   | 213           | 88/100                               | WP_016526060.1                                       |                              |                                  |                  |
|                |             |                    |                                                                                     |                                 |                                      | PemK/MazF family toxin [ <i>Fibrobacter sp. UWCM</i> ]                                                  | 342           | 80/100                               | WP_022932935.1                                       |                              |                                  |                  |
| SSU-Pro-46     | SUPA3-SUPA4 | 971                |  | No significant similarity found | -                                    | Hypothetical protein [ <i>Treponema socranskii</i> ]                                                    | 267           | 80/100                               | WP_021329686.1                                       | Y                            | N                                | MH536757         |
|                |             |                    |                                                                                     |                                 |                                      | Hypothetical protein [ <i>Treponema socranskii</i> ]                                                    | 228           | 84/100                               | WP_021329641.1                                       |                              |                                  |                  |
|                |             |                    |                                                                                     |                                 |                                      | DUF4160 domain-containing protein [ <i>Treponema sp. C6A8</i> ]                                         | 276           | 67/100                               | WP_027729334.1                                       |                              |                                  |                  |
| SSU-Pro-65     | SUPA3-SUPA4 | 811                |  | <i>Treponema sp.</i> OMZ 838    | 91/21                                | AbrB/MazE/SpoVT family DNA-binding domain-containing protein (Antitoxin) [ <i>Treponema denticola</i> ] | 228           | 93/100                               | WP_010693782.1                                       | Y                            | N                                | MH536758         |

| Gene cassettes | Primer pair | Cassette Size (bp) | Orientation*                                                                        | BlastN                                  |                                       | BlastX                                                                                     |               |                                      |                                                      | Promoter activity            |                                  | Accession number |
|----------------|-------------|--------------------|-------------------------------------------------------------------------------------|-----------------------------------------|---------------------------------------|--------------------------------------------------------------------------------------------|---------------|--------------------------------------|------------------------------------------------------|------------------------------|----------------------------------|------------------|
|                |             |                    |                                                                                     | Closest homologue                       | Percentage identity (%)/ Coverage (%) | Closest homologue                                                                          | ORF size (bp) | Percentage identity (%)/Coverage (%) | Accession number of the homologous proteins (BlastX) | Sense Strand ( <i>gusA</i> ) | Antisense strand ( <i>lacZ</i> ) |                  |
|                |             |                    |                                                                                     |                                         |                                       | VapC family toxin [ <i>Treponema denticola</i> ]                                           | 402           | 93/100                               | WP_010693784.1                                       |                              |                                  |                  |
| MMU-Pro-4      | MARS5-MARS2 | 520                |    | MMU2                                    | 99/100                                | -                                                                                          | -             | -                                    | -                                                    | Y                            | Y                                | MH536759         |
| MMU-Pro-5      | MARS5-MARS2 | 983                |    | <i>Treponema putidum</i> strain OMZ 758 | 94/78                                 | Prevent-host-death protein (Phd_YefM antitoxin superfamily) [ <i>Treponema denticola</i> ] | 240           | 98/98.8                              | WP_002669519.1                                       | Y                            | Y                                | MH536760         |
|                |             |                    |                                                                                     |                                         |                                       | RelE/StbE family addiction module toxin [ <i>Treponema denticola</i> ]                     | 318           | 94/100                               | WP_002688980.1                                       |                              |                                  |                  |
| MMU-Pro-6      | MARS5-MARS2 | 737                |    | MMB36                                   | 86/100                                | -                                                                                          | -             | -                                    | -                                                    | N                            | Y                                | MH536761         |
| MMU-Pro-18     | MARS5-MARS2 | 634                |    | MMB37                                   | 95/100                                | -                                                                                          | -             | -                                    | -                                                    | Y                            | N                                | MH536762         |
| MMU-Pro-22     | MARS5-MARS2 | 431                |  | MMU19                                   | 91/100                                | -                                                                                          | -             | -                                    | -                                                    | Y                            | Y                                | MH536763         |
| MMU-Pro-24     | MARS5-MARS2 | 904                |  | No significant similarity found         | -                                     | Universal stress protein [ <i>Marinobacter</i> sp.]                                        | 348           | 30/54.1                              | WP_008177208.1                                       | Y                            | Y                                | MH536764         |
|                |             |                    |                                                                                     |                                         |                                       | Hypothetical protein [ <i>Methylobacter tundripaludum</i> ]                                | 213           | 79/100                               | WP_031438379.1                                       |                              |                                  |                  |

| Gene cassettes | Primer pair | Cassette Size (bp) | Orientation* | BlastN                          |                                      | BlastX                                                                                      |               |                                      |                                                      | Promoter activity            |                                  | Accession number |
|----------------|-------------|--------------------|--------------|---------------------------------|--------------------------------------|---------------------------------------------------------------------------------------------|---------------|--------------------------------------|------------------------------------------------------|------------------------------|----------------------------------|------------------|
|                |             |                    |              | Closest homologue               | Percentage identity (%)/Coverage (%) | Closest homologue                                                                           | ORF size (bp) | Percentage identity (%)/Coverage (%) | Accession number of the homologous proteins (BlastX) | Sense Strand ( <i>gusA</i> ) | Antisense strand ( <i>lacZ</i> ) |                  |
|                |             |                    |              |                                 |                                      | Prevent-host-death protein [ <i>Treponema pedis</i> ]                                       | 84            | 76/27.8                              | WP_024469914.1                                       |                              |                                  |                  |
| MMU-Pro-31     | MARS5-MARS2 | 574                |              | MMB5                            | 88/70                                | -                                                                                           | -             | -                                    | -                                                    | Y                            | N                                | MH536765         |
| MMU-Pro-48     | MARS5-MARS2 | 817                |              | <i>Treponema sp.</i> OMZ 838    | 91/25                                | AbrB/MazE/SpoVT family DNA-binding domain-containing protein [ <i>Treponema denticola</i> ] | 228           | 93/100                               | WP_010693782.1                                       | Y                            | N                                | MH536766         |
|                |             |                    |              |                                 |                                      | VapC family toxin [ <i>Treponema denticola</i> ]                                            | 402           | 93/100                               | WP_010693784.1                                       |                              |                                  |                  |
| MMU-Pro-53     | MARS5-MARS2 | 430                |              | No significant similarity found | -                                    | -                                                                                           | -             | -                                    | -                                                    | Y                            | Y                                | MH536767         |
| MMU-Pro-63     | MARS5-MARS2 | 927                |              | SSU8                            | 99/99                                | Hypothetical protein [ <i>Treponema denticola</i> ]                                         | 531           | 98/93.7                              | WP_002692239.1                                       | N                            | Y                                | MH536768         |
| MMU-Pro-65     | MARS5-MARS2 | 896                |              | MMU27                           | 99/100                               | Hypothetical protein [uncultured bacterium]                                                 | 399           | 99/84.2                              | ANC55539.1                                           | N                            | Y                                | MH536769         |
|                |             |                    |              |                                 |                                      | Hypothetical protein [uncultured bacterium]                                                 | 357           | 99/100                               | ANC55540.1                                           |                              |                                  |                  |

\* The orange half circles and green arrow boxes are representing *attC* sites and ORFs, respectively.

\*\* The GCs found in this study are highlighted in yellow. Those not highlighted were also detected in Tansirichaiya et al. (2016)<sup>2</sup>.



**Supplementary Table S3;** Primers used in this study

| Primer name                                                             | Sequence (5'-3') <sup>a</sup>                                                                                     | Gene target                         | Reference    |
|-------------------------------------------------------------------------|-------------------------------------------------------------------------------------------------------------------|-------------------------------------|--------------|
| <b>Primers for the cloning of GCs into pUC19-<i>gusA</i> constructs</b> |                                                                                                                   |                                     |              |
| <b>SUPA4-KpnI</b>                                                       | CGCGCG <b>GGTACCCCGCAAATGCAGGTTAAGCG</b>                                                                          | <i>attC</i> site (forward primer)   | This study   |
| <b>SUPA3-EcoRI</b>                                                      | CGCGCG <b>GAATTC</b> CAGGTTGAAGCGGGTGTAG                                                                          | <i>attC</i> site (reverse primer)   | This study   |
| <b>SUPA4-EcoRI</b>                                                      | GCGGCC <b>GAATTC</b> CCGCAAATGCAGGTTAAGCG                                                                         | <i>attC</i> site (forward primer)   | This study   |
| <b>SUPA3-KpnI</b>                                                       | CGCGCG <b>GGTACCC</b> AGGTTGAAGCGGGTGTAG                                                                          | <i>attC</i> site (reverse primer)   | This study   |
| <b>TMB4-Pc-F1-KpnI</b>                                                  | CGGCC <b>GGTACCT</b> GCGTGCGTTATCCCATTA                                                                           | TMB4 Pc promoter (forward primer)   | This study   |
| <b>TMB4-Pc-R1-EcoRI</b>                                                 | CGCGCG <b>GAATTC</b> CATCTTTTCGACCTTTCCTC                                                                         | TMB4 Pc promoter (reverse primer)   | This study   |
| <b>TMB4-GC-F1-KpnI</b>                                                  | CGCGCG <b>GGTACCT</b> TAGACAGATGCCTTGCGG                                                                          | TMB4 gene cassette (forward primer) | This study   |
| <b>TMB4-GC-F1-EcoI</b>                                                  | CGCGCG <b>GAATTC</b> TAGACAGATGCCTTGCGG                                                                           | TMB4 gene cassette (forward primer) | This study   |
| <b>TMB1-F1-KpnI</b>                                                     | CGCCGG <b>GGTACCC</b> GATCTTCTTTTTTCCGTT                                                                          | TMB1 Pc promoter (forward primer)   | This study   |
| <b>TMB1-R1-EcoRI</b>                                                    | CCCGCC <b>GAATTC</b> ACTTCCCTTCGACCCTTCTCT                                                                        | TMB1 Pc promoter (reverse primer)   | This study   |
| <b>Pfla-A</b>                                                           | CGACTTTTTTCTAAACCCGCCTTAAAAATAAGC<br>CGAAAATTTATTGAAGTAACATAGGATCAATGT<br>ATAGGAGGTTTCATG                         | P <sub>f1a</sub> sense strand oligo | <sup>3</sup> |
| <b>Pfla-B</b>                                                           | <b>AATTC</b> ATGAACCTCCTATACATTGATCCTATGTTA<br>CTTCAATAAATTTTCGGCTTATTTTTAAGGCGGG<br>TTTAGGAAAAAAGT <b>CGGTAC</b> | Pfla antisense strand oligo         | <sup>3</sup> |

| Primer name                                                                                              | Sequence (5'-3') <sup>a</sup>                                                                                  | Gene target                                                  | Reference  |
|----------------------------------------------------------------------------------------------------------|----------------------------------------------------------------------------------------------------------------|--------------------------------------------------------------|------------|
| <b>Tdtrop/O-A</b>                                                                                        | CGGGATTGACCTTGACATTTTCTTATTTTTTTAT<br>ATATTATAATCATAATTTTGATATATCAAATAG<br>GAGATTTGAAG                         | P <sub>TdTro</sub> sense strand<br>oligo                     | 4          |
| <b>Tdtrop /O-B</b>                                                                                       | <b>AATTCTTCAAATCTCCTATTTTGATATATCAAAT</b><br>TATGATTATAATATATAAAAAAATAAAGAAAATG<br>TCAAGCTGAATCCCGGTAC         | P <sub>TdTro</sub> antisense strand<br>oligo                 | 4          |
| <b>Primers for the construction of pCC1BAC-<i>lacZα</i>-<i>gusA</i> vectors.</b>                         |                                                                                                                |                                                              |            |
| <b><i>lacZ</i>-F1</b>                                                                                    | CGGCGC <b>GACGTC</b> <u>AGAGAATATAAAAAAGCCGGA</u><br><u>TTATTAATCCGGCTTTTTTATTATTTGTCGGGGCT</u><br>GGCTTAACTAT | <i>lacZα</i> (Forward<br>primer)                             | This study |
| <b><i>lacZ</i>-R1</b>                                                                                    | GCGGCGAT <b>GCATT</b> GTGAGCGGATAACAATTC                                                                       | <i>lacZα</i> (Reverse primer)                                | This study |
| <b><i>gusA</i>-F1</b>                                                                                    | GCGGCGAT <b>GCATGCTAG</b> CATCACGAATTCCTGC<br>AGTAA                                                            | <i>gusA</i> (Forward primer)                                 | This study |
| <b><i>gusA</i>-R1</b>                                                                                    | GGGCGG <b>CCTAGG</b> <u>AAATAATAAAAAAGCCGGAT</u><br><u>TAATAATCCGGCTTTTTATATTCTCTCGCCAGGA</u><br>GAGTTGTTGATT  | <i>gusA</i> (Forward primer)                                 | This study |
| <b>pCC1BAC-del<i>lacZ</i>-F1</b>                                                                         | CCCCC <b>CCTAGG</b> CCGTCGACCAATTCTCATGT                                                                       | pCC1BAC <i>lacZα</i><br>deletion (Forward<br>primer)         | This study |
| <b>pCC1BAC-del<i>lacZ</i>-R1</b>                                                                         | GCGGCG <b>GACGTCTAG</b> TTAAGCCAGCCCCGACA                                                                      | pCC1BAC <i>lacZα</i><br>deletion (reverse<br>primer)         | This study |
| <b>Primers for the amplification of GCs and promoters into pCC1BAC-<i>lacZα</i>-<i>gusA</i> vectors.</b> |                                                                                                                |                                                              |            |
| <b>pUC-GC-F1-Nsil</b>                                                                                    | GCGGCGAT <b>GCATTT</b> GTAATTCGACGGCCAGTG                                                                      | GC on pUC19-GC- <i>gusA</i><br>construct (forward<br>primer) | This study |
| <b>pUC-GC-R1-NheI</b>                                                                                    | GGGCGG <b>GCTAGC</b> ATTTTCTCCGCTACTCCAGG                                                                      | GC on pUC19-GC- <i>gusA</i><br>construct (reverse<br>primer) | This study |

| Primer name                                                                   | Sequence (5'-3') <sup>a</sup>             | Gene target                                               | Reference  |
|-------------------------------------------------------------------------------|-------------------------------------------|-----------------------------------------------------------|------------|
| <b>pUC-GC-F1-NheI</b>                                                         | CGCGCG <b>GCTAGC</b> TTGTAATTCGACGGCCAGTG | GC on pUC19-GC- <i>gusA</i><br>construct (forward primer) | This study |
| <b>pUC-GC-R1-NsiI</b>                                                         | GGGCGG <b>ATGCAT</b> ATTTTCTCCGCTACTCCAGG | GC on pUC19-GC- <i>gusA</i><br>construct (reverse primer) | This study |
| <b>SUPA4-NsiI</b>                                                             | GCGGCC <b>ATGCAT</b> CCGCAAATGCAGGTTAAGCG | <i>attC</i> site (forward primer)                         | This study |
| <b>SUPA3-NheI</b>                                                             | CGCGCG <b>GCTAGC</b> CCAGGTTGAAGCGGGTGTAG | <i>attC</i> site (reverse primer)                         | This study |
| <b>MARS5-NsiI</b>                                                             | GCGGCC <b>ATGCAT</b> CGCAAATGCAGGTTAAGCG  | <i>attC</i> site (forward primer)                         | This study |
| <b>MARS2-NheI</b>                                                             | CGCGCG <b>GCTAGC</b> GCAATGTCAGGTTGAAGC   | <i>attC</i> site (reverse primer)                         | This study |
| <b>Primers for sequencing of inserts in pCC1BAC-<i>lacZα-gusA</i> vectors</b> |                                           |                                                           |            |
| <b><i>lacZ-F2</i></b>                                                         | GTTTTCCCAGTCACGACGTT                      | Insert forward sequencing                                 | This study |
| <b><i>gusA-R2</i></b>                                                         | CGGCGAACTGATCGTTAAAA                      | Insert reverse sequencing                                 | This study |

<sup>a</sup> Restriction sites and bi-directional terminators were indicated as bold and italic styles, respectively.

**Supplementary Table S4;** Complementarity of the core sites R' (1R) and R'' (1L) abutting the forward and reverse attC primer sequence on the gene cassettes.

| Type<br>(Number of GCs) | Sequence of R'<br>after the forward<br>primer sequence<br>of the attC on GCs | Pattern of R'<br>sequence of the<br>GC <sup>a</sup> | Sequence of R''<br>before the reverse<br>primer of the attC<br>on GCs GC | Pattern of R''<br>sequence of the<br>attC on GCs GC <sup>a</sup> | Gene cassettes                                                                     | Complementarity between R'<br>and R'' core sites of the attC<br>on GCs |
|-------------------------|------------------------------------------------------------------------------|-----------------------------------------------------|--------------------------------------------------------------------------|------------------------------------------------------------------|------------------------------------------------------------------------------------|------------------------------------------------------------------------|
| <b>A (15)</b>           | GTTAGGT                                                                      | GTTRRRY                                             | ACCTAAC                                                                  | RYYAAC                                                           | SSU-Pro-20,<br>SSU-Pro-32,<br>SSU-Pro-65,<br>MMU-PRO-24,<br>MMU-PRO-48             | 7/7                                                                    |
|                         | GTTAGAC                                                                      | GTTRRRY                                             | GTCTAAC                                                                  | RYYAAC                                                           | SSU-Pro-24,<br>MMU-Pro-4<br>MMU-PRO-5,<br>MMU-PRO-18,<br>MMU-PRO-22,<br>MMU-PRO-53 | 7/7                                                                    |
|                         | GTTGAAC                                                                      | GTTRRRY                                             | CTTCAAC                                                                  | YYAAC                                                            | SSU-Pro-9,<br>SSU-Pro-34                                                           | 6/7                                                                    |
|                         | GTTAGAC                                                                      | GTTRRRY                                             | GCCTAAC                                                                  | RYYAAC                                                           | MMU-PRO-6                                                                          | 6/7                                                                    |
|                         | GTTGAAC                                                                      | GTTRRRY                                             | GTCTAAC                                                                  | RYYAAC                                                           | MMU-PRO-31                                                                         | 5/7                                                                    |
| <b>B (3)</b>            | GTTAGAA                                                                      | GTTRRRR                                             | TTCTAAC                                                                  | YYAAC                                                            | SSU-Pro-7                                                                          | 7/7                                                                    |
|                         | GTTAGAG                                                                      | GTTRRRR                                             | CTCTAAC                                                                  | YYAAC                                                            | SSU-Pro-46                                                                         | 7/7                                                                    |
|                         | GTTAGGA                                                                      | GTTRRRR                                             | TCCTAAC                                                                  | YYAAC                                                            | MMU-PRO-65                                                                         | 7/7                                                                    |

| Type<br>(Number of GCs) | Sequence of R'<br>after the forward<br>primer sequence<br>of the <i>attC</i> on GCs | Pattern of R'<br>sequence of the<br>GC <sup>a</sup> | Sequence of R''<br>before the reverse<br>primer of the <i>attC</i><br>on GCs GC | Pattern of R''<br>sequence of the<br><i>attC</i> on GCs GC <sup>a</sup> | Gene cassettes | Complementarity between R'<br>and R'' core sites of the <i>attC</i><br>on GCs |
|-------------------------|-------------------------------------------------------------------------------------|-----------------------------------------------------|---------------------------------------------------------------------------------|-------------------------------------------------------------------------|----------------|-------------------------------------------------------------------------------|
| <b>C (3)</b>            | GTTATGT                                                                             | GTTRYRY                                             | ACCTAAC                                                                         | RYYAAC                                                                  | SSU-Pro-16     | 6/7                                                                           |
|                         | GTTATGT                                                                             | GTTRYRY                                             | ACCTAAC                                                                         | RYYAAC                                                                  | SSU-Pro-39     | 6/7                                                                           |
|                         | GTTATAC                                                                             | GTTRYRY                                             | GCCTAAC                                                                         | RYYAAC                                                                  | MMU-PRO-63     | 5/7                                                                           |
| <b>D (2)</b>            | GTTAGCT                                                                             | GTTRRY                                              | AGCTAAC                                                                         | RRYYAAC                                                                 | SSU-Pro-13     | 7/7                                                                           |
|                         | GTTAGCT                                                                             | GTTRRY                                              | ATCTAAC                                                                         | RYYAAC                                                                  | SSU-Pro-27     | 6/7                                                                           |

i.) Without Promoter GC at the first position

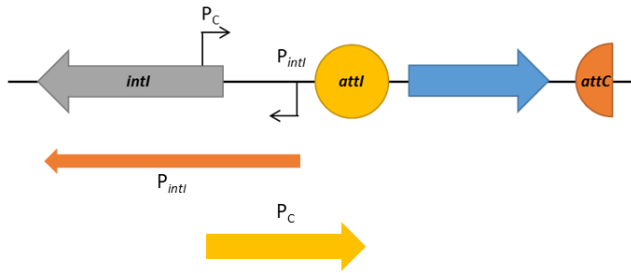

ii.) With Promoter GC at the first position

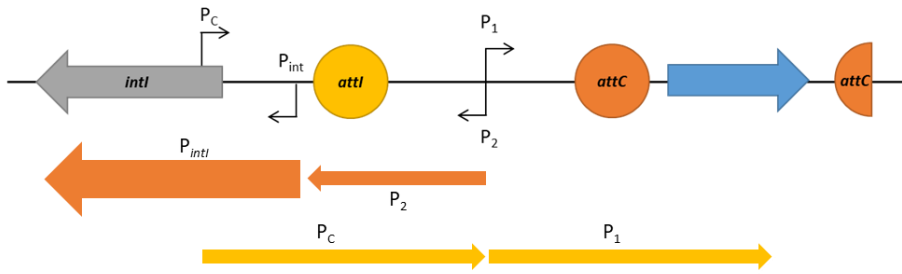

iii.) After insertion of new GC

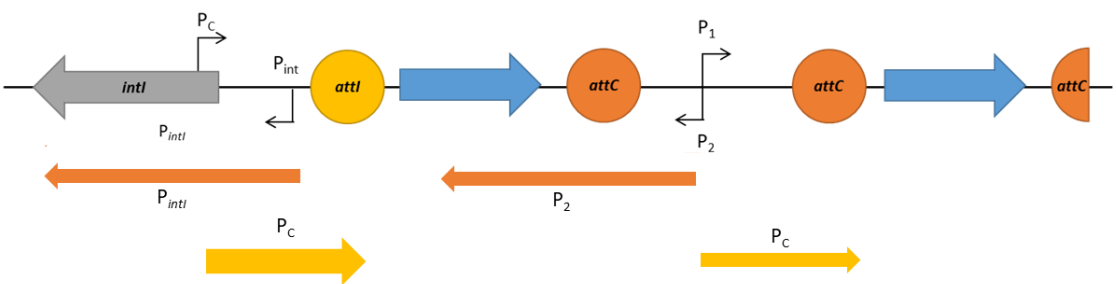

**Supplementary Figure 1:** The proposed hypothesis regarding integrase expression when the promoter GC is inserted in the first position of in integron. (i) Without the promoter GC, it was previously shown that there was a transcriptional interference (TI) between  $P_{intI}$  and  $P_C$  which controls the expression of integrase<sup>5,6</sup>. (ii) The insertion of promoter GC in the first position would increase the expression of integrase, as the antisense GC promoter ( $P_2$ ) could increase transcription on the antisense strand and relieve the TI between  $P_{intI}$  and  $P_C$  by reducing activity at  $P_C$ . (iii) Increased expression of integrase would catalyse the insertion of a new GC at the *attI*, shifting the promoter GC into the second position. The level of integrase will be decreased as there will be lower de-repression of TI from the antisense promoter GC. The grey and blue open arrowed boxes represent integrase gene (*intI*) and the open reading frames (ORFs), respectively, pointing in the direction of transcription. The recombination sites, *attI* and *attC*, were represented by yellow and orange circles, respectively. The yellow and orange

arrows indicate the promoter activity in sense and antisense strands, respectively. The thickness of the arrows represents the hypothesised relative promoter activity in each stage.

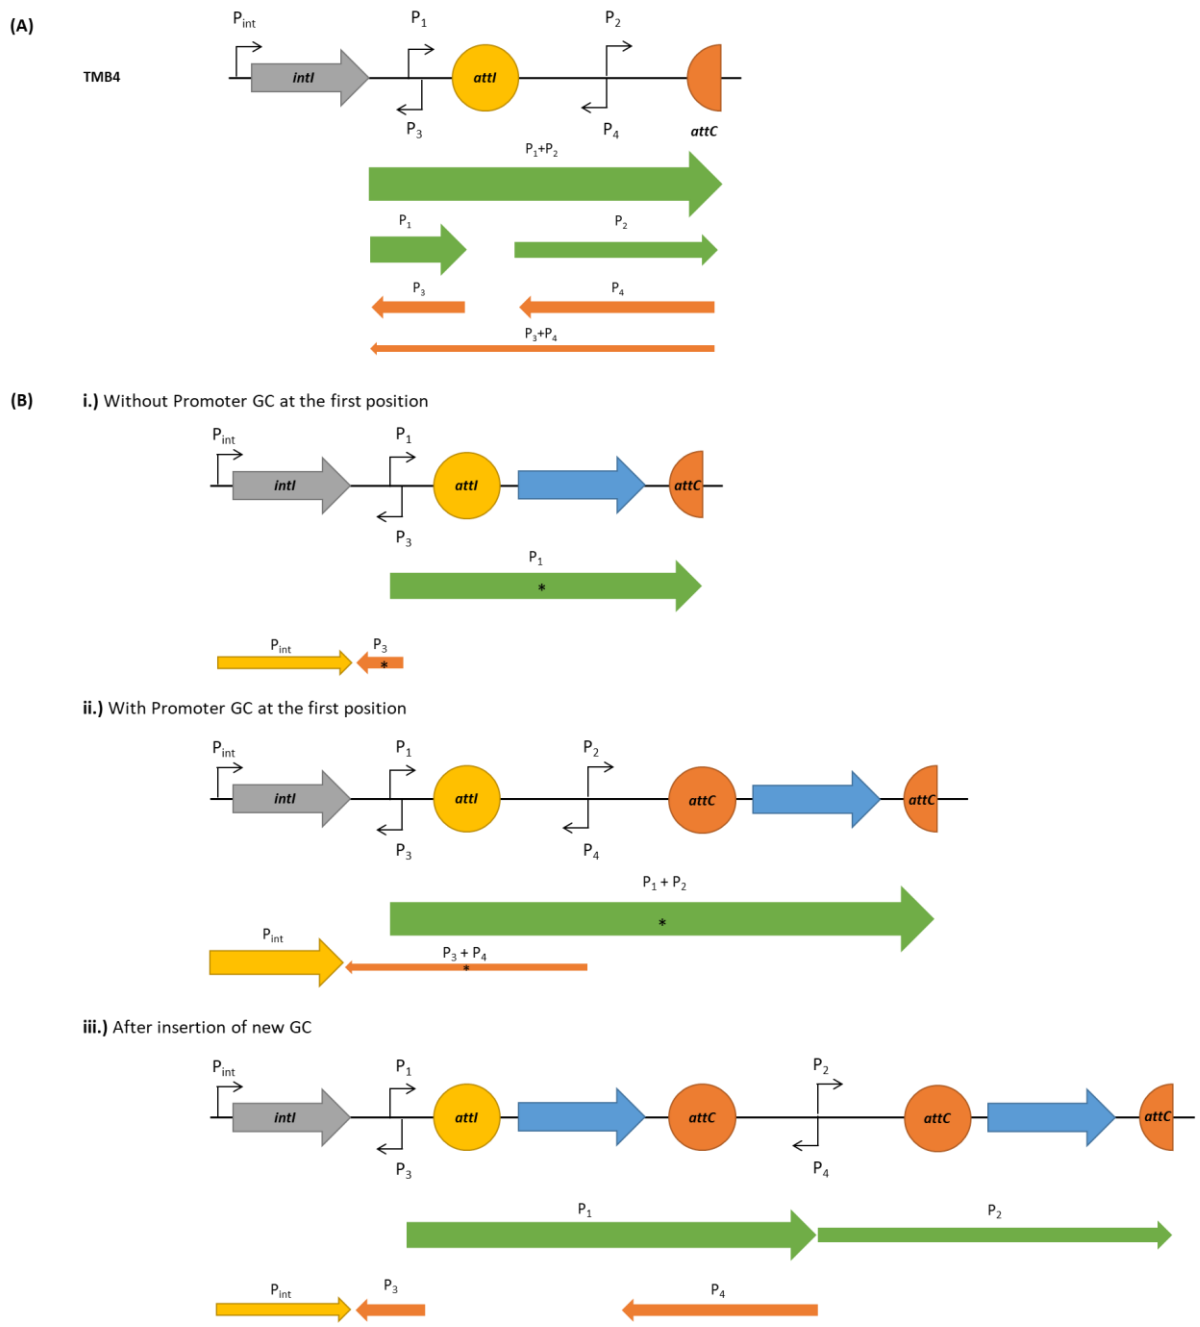

**Supplementary Figure 2:** The transcriptional activity (TI) of the TMB4 GC constructs. (A) Schematic representation of the structure of TMB4 in the integron. The thickness of the arrows represents the relative promoter activity from  $\beta$ -glucuronidase assays in TMB4  $P_C$  ( $P_1$  and  $P_3$ ), GC ( $P_2$  and  $P_4$ ) and  $P_C$ +GC ( $P_1$ + $P_2$  and  $P_3$ + $P_4$ ), based on the results in Figure 4. (B) The proposed hypothesis on integrase expression when the promoter GC is inserted in the first position of in the reverse integrons. (i) Without the promoter GC, there are promoter activities in both sense and antisense direction from  $P_C$  ( $P_1$  and  $P_3$ ) as shown by the results in TMB4  $P_C$  in figure 4. (ii) When the promoter GC inserted in the first position,



the expression level on the sense strand increased ( $P_1 + P_2$ ), which in turn decreased the expression level on the antisense strand ( $P_1+P_3$ ), possibly through TI, as shown by the activity of TMB4  $P_C+GC$  in Figure 4. The level of  $P_{intl}$  is, therefore, hypothesised to be increased, due to the de-repression of TI between  $P_{intl}$  and  $P_3$  by the insertion of the promoter GC. (iii) Increasing integrase expression will catalyse an insertion of a new GC at *attI*, which will push the promoter GC the second position. This would reduce the expression level of integrase because the promoter activity of  $P_3$  would be restored and increased due to an absence of TI from  $P_2$ , resulting in higher TI between  $P_{intl}$  and  $P_3$ . The grey and blue open arrowed boxes represent integrase gene (*intl*) and the open reading frames (ORFs), respectively, pointing in the direction of transcription. The recombination sites, *attI* and *attC*, were represented by yellow and orange circles, respectively. The green and orange arrows indicate the promoter activity from the  $P_C$  promoter and promoter GC in sense and antisense strands, respectively, while the yellow arrows represent the promoter activity from  $P_{intl}$ . The asterisks indicate the experimentally verified relative expression level, shown in Figure 4 (TMB4  $P_C$  and TMB4  $P_C+GC$ ).

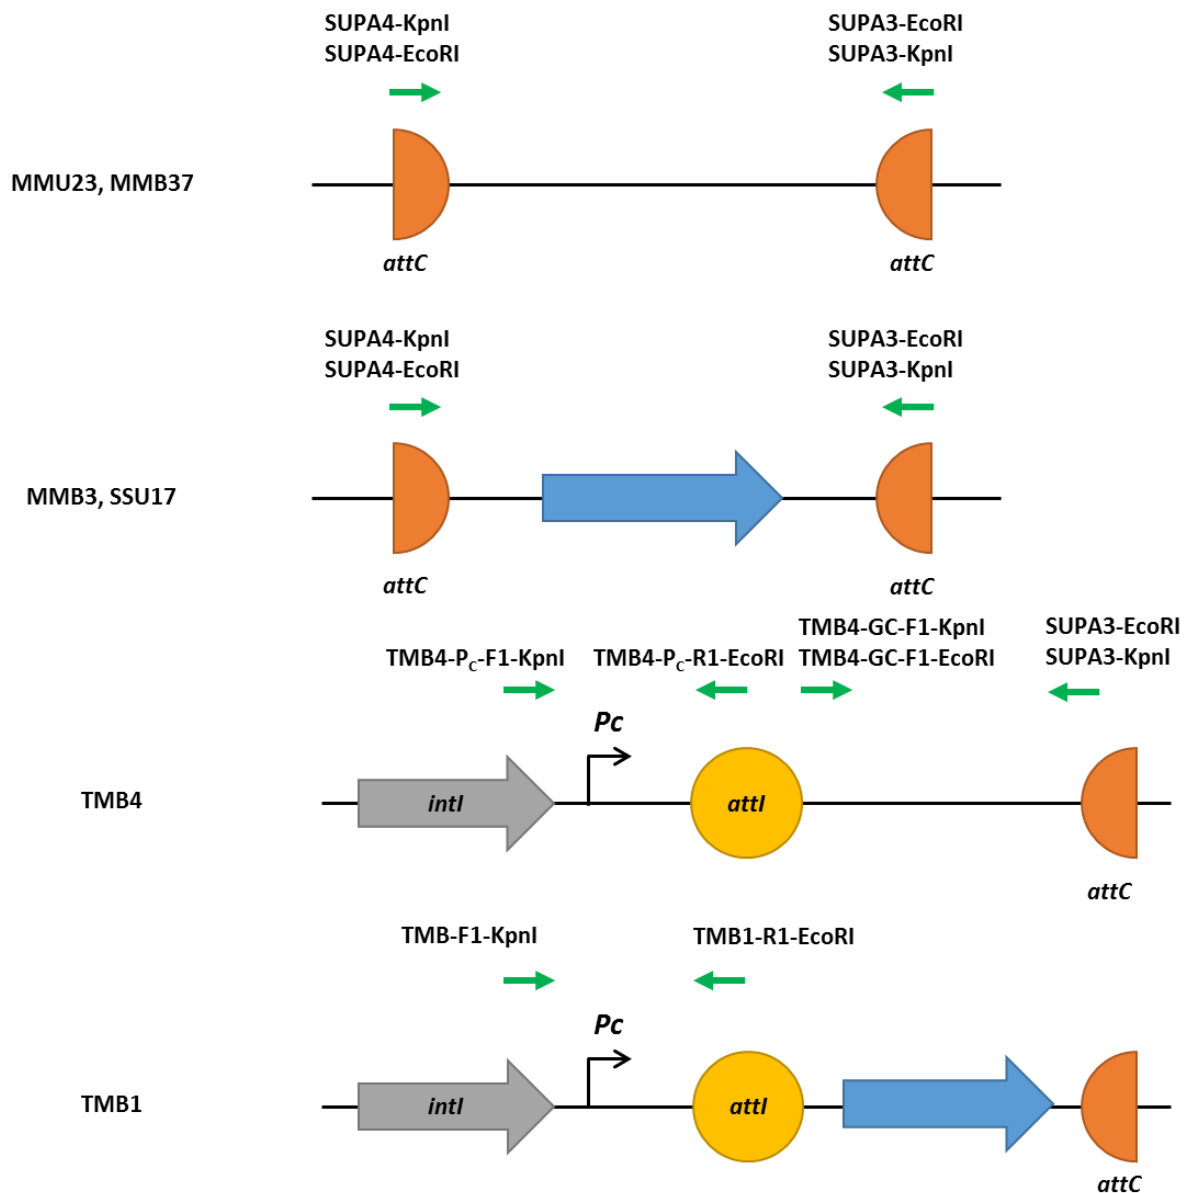

**Supplementary Figure 3:** The amplification of the selected GCs from GC-containing pGEM-T easy vectors. The green arrows indicate the primer binding sites. The grey and blue open arrowed boxes represent integrase gene (*intI*) and the open reading frames (ORFs), respectively, pointing in the direction of transcription. The promoters,  $P_{intI}$  and  $P_c$ , were represented by black arrows. The recombination sites, *attI* and *attC*, were represented by yellow and orange circles, respectively.

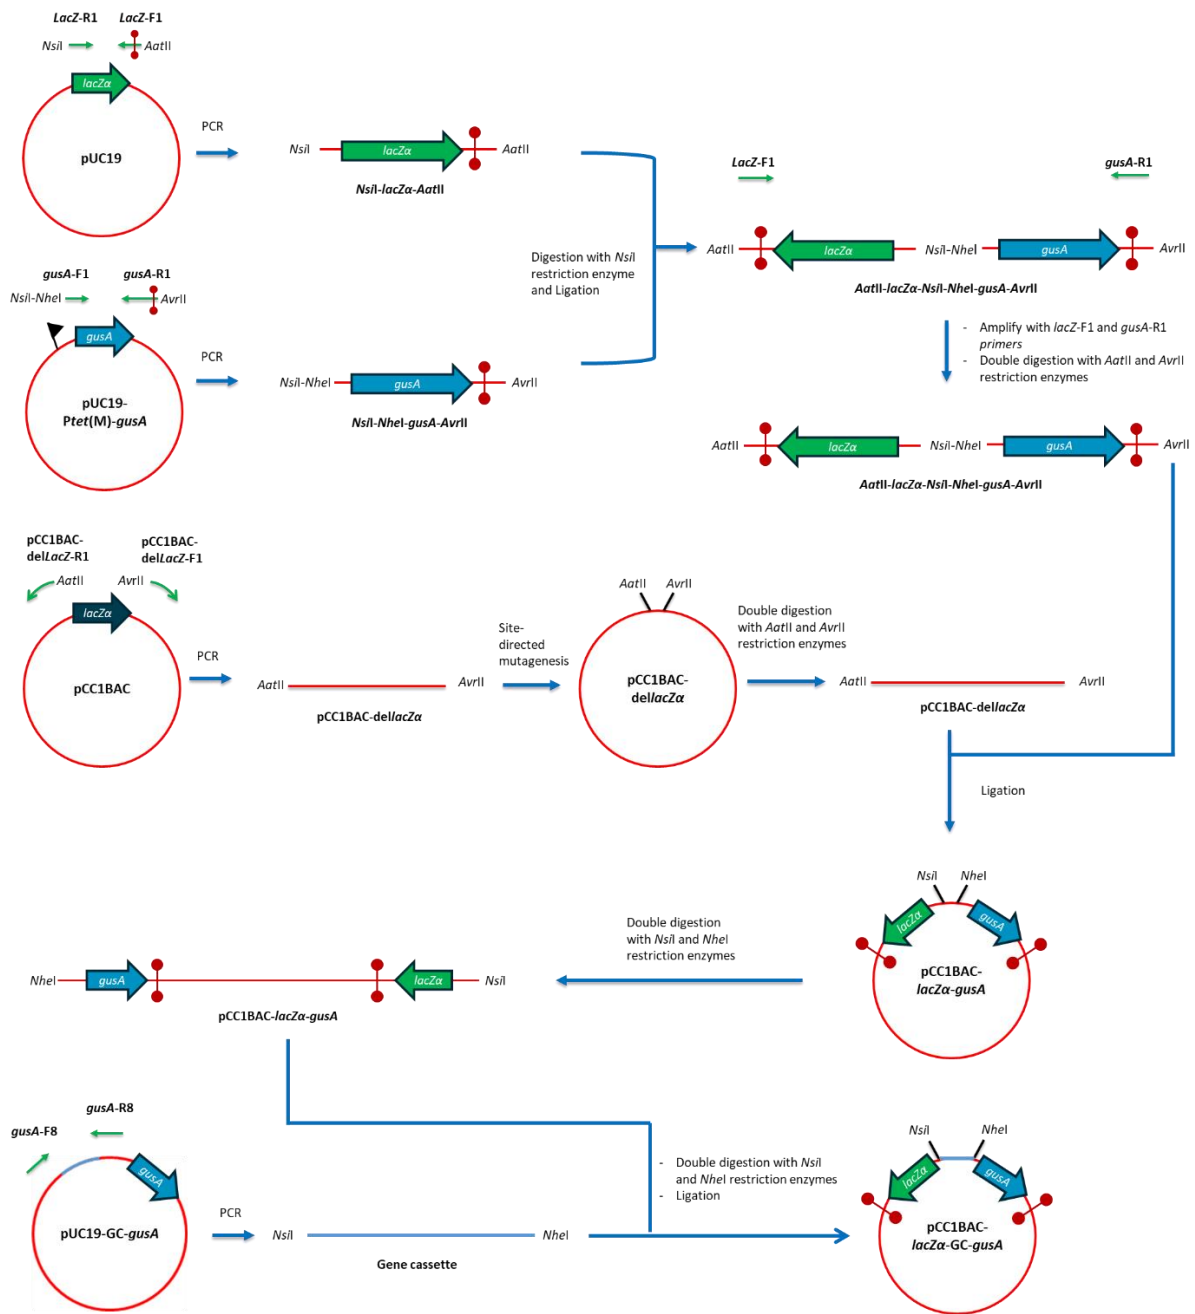

**Supplementary Figure 4:** Construction of pCC1BAC-*lacZα*-GC-*gusA* constructs. The *lacZα* and *gusA* reporter genes were amplified from pUC19 and pUC19-Ptet(M), respectively. Both reporters were ligated together and inserted in between AatII and AvrII sites of the pCC1BAC-dellacZα plasmid, forming pCC1BAC-*lacZα*-*gusA*. The inserts were amplified and cloned into the NsiI and NheI sites on pCC1BAC-*lacZα*-*gusA* plasmid. The green arrows and black lines represent primer binding sites and restriction sites, respectively. The symbol ( ▴ ) and ( ● ) represent promoter and bi-directional

terminators, respectively. The reporter genes were represented as open arrow boxes, pointing in the direction of transcription.

## **References**

- 1 Solovyev, V. & Salamov, A. in *In Metagenomics and its Applications in Agriculture, Biomedicine and Environmental Studies* (ed R.W. Li) 61-78 (Nova Science Publishers, 2011).
- 2 Tansirichaiya, S., Rahman, M. A., Antepowicz, A., Mullany, P. & Roberts, A. P. Detection of Novel Integrons in the Metagenome of Human Saliva. *PloS one* **11**, e0157605, doi:10.1371/journal.pone.0157605 (2016).
- 3 Limberger, R. J., Slivienski, L. L., Izard, J. & Samsonoff, W. A. Insertional inactivation of *Treponema denticola tap1* results in a nonmotile mutant with elongated flagellar hooks. *Journal of bacteriology* **181**, 3743-3750 (1999).
- 4 Brett, P. J., Burtnick, M. N., Fenno, J. C. & Gherardini, F. C. *Treponema denticola* TroR is a manganese- and iron-dependent transcriptional repressor. *Molecular microbiology* **70**, 396-409, doi:10.1111/j.1365-2958.2008.06418.x (2008).
- 5 Jove, T., Da Re, S., Denis, F., Mazel, D. & Ploy, M. C. Inverse correlation between promoter strength and excision activity in class 1 integrons. *PLoS genetics* **6**, e1000793, doi:10.1371/journal.pgen.1000793 (2010).
- 6 Guerin, E., Jove, T., Tabesse, A., Mazel, D. & Ploy, M. C. High-level gene cassette transcription prevents integrase expression in class 1 integrons. *Journal of bacteriology* **193**, 5675-5682, doi:10.1128/jb.05246-11 (2011).
